# Supplementary material
Source: PubMed Central journal article supplement (PMC6298816)
Supplement: NIHMS992121-supplement-Supplemental_Figure_1.pdf [file NIHMS992121-supplement-Supplemental_Figure_1.pdf]

## INSTRUCTIONS FOR USE

**HemoTypeSC™ is a rapid test kit for the determination of hemoglobin (Hb) type in whole blood.** This test is a competitive lateral flow assay incorporating monoclonal antibodies for detection of hemoglobin A, hemoglobin S, and hemoglobin C. HemoTypeSC™ provides point-of-care detection of the following hemoglobin phenotypes: HbAA (normal), HbSS & HbSC (sickle cell disease), HbCC (hemoglobin C disease), and HbAS & HbAC (carrier, or trait).

- HemoTypeSC™ does not detect fetal hemoglobin, and results are not affected by fetal hemoglobin.
- Phenotype HbS/β<sub>0</sub>-Thalassemia will produce the same HemoTypeSC™ result as HbSS.
- Other hemoglobin variants (e.g. HbD or HbE) will produce the same HemoTypeSC™ result as HbA.

**Observe biohazard safety procedures when handling human blood samples and disposing of used materials. Do not reuse any test strips or blood sampling devices.**

**The HemoTypeSC™ Test Kit Includes:**

1. One Foil Pouch containing the following:
  - a. One Vial of 50 Test Strips – single-use, disposable
  - b. One Vial of 50 Blood Sampling Devices – single-use, disposable
  - c. One Bag of Three Dropper Pipettes – reusable
  - d. One Instructions for Use Sheet

**Materials Not Provided:**

1. Water – use drinking water or tap water
  2. Timer
  3. \* Lancing Device and Lancets
  4. \* Test Vials (1.5 mL tubes or vials of similar size may be used)
  5. \* Rack for holding Test Vials
- \* Available as part of the HemoTypeSC™ Accessory Pack*

**Storage/Shelf-Life:** Store HemoTypeSC™ at room temperature. Test Strip Vial and Blood Sampling Device Vial are provided in a sealed Foil Pouch. The Expiration Date of the unopened pouch is printed on the pouch. Do not use any test components after the expiration date.

**IMPORTANT: Use all Test Strips and Blood Sampling Devices within 30 days of opening the Foil Pouch.**

**PROCEDURE (WHOLE BLOOD):**

**Please read these instructions thoroughly before beginning to test samples.**

|                                                                                                                                                                                                                                                                                                                                                                                                                                                                                                                                      |                                                                                                                                                                                                                                                                                                                                                                                                                                                                            |                                                                                                                                                                                                                                                                                                                                                                                    |
|--------------------------------------------------------------------------------------------------------------------------------------------------------------------------------------------------------------------------------------------------------------------------------------------------------------------------------------------------------------------------------------------------------------------------------------------------------------------------------------------------------------------------------------|----------------------------------------------------------------------------------------------------------------------------------------------------------------------------------------------------------------------------------------------------------------------------------------------------------------------------------------------------------------------------------------------------------------------------------------------------------------------------|------------------------------------------------------------------------------------------------------------------------------------------------------------------------------------------------------------------------------------------------------------------------------------------------------------------------------------------------------------------------------------|
| <ol style="list-style-type: none"> <li>1. Using Dropper Pipette, add six (6) drops of water to Test Vial. Place Test Vial in a compatible rack.</li> <li>2. Open Vial of Blood Sampling Devices, remove one Blood Sampling Device, and reclose Vial. Obtain blood sample – a small drop is sufficient (1 to 2 microliters). Touch the white pad below the blue cover of the Blood Sampling Device to blood sample, until the white pad absorbs the blood droplet. <b>Ensure that the entire white pad has turned red.</b></li> </ol> | <ol style="list-style-type: none"> <li>3. Insert Blood Sampling Device into Test Vial and swirl to mix.                     <ol style="list-style-type: none"> <li>a) <b>Sufficient swirling is essential</b> for blood to be properly transferred into Test Vial.</li> <li>b) Check visually to ensure that water has become <b>pink or light-red</b> in color.</li> <li>c) Leave Blood Sampling Device inside the Test Vial water after swirling.</li> </ol> </li> </ol> | <ol style="list-style-type: none"> <li>4. Open Vial of Test Strips, remove one Test Strip, and reclose Vial. Insert HemoTypeSC™ Test Strip into Test Vial with arrows pointing <b>DOWN</b>.</li> <li>5. Wait 10 minutes.</li> <li>6. Take HemoTypeSC™ Test Strip out of the Test Vial and read results. Compare Test Strip to Results Chart on next page for reference.</li> </ol> |
|--------------------------------------------------------------------------------------------------------------------------------------------------------------------------------------------------------------------------------------------------------------------------------------------------------------------------------------------------------------------------------------------------------------------------------------------------------------------------------------------------------------------------------------|----------------------------------------------------------------------------------------------------------------------------------------------------------------------------------------------------------------------------------------------------------------------------------------------------------------------------------------------------------------------------------------------------------------------------------------------------------------------------|------------------------------------------------------------------------------------------------------------------------------------------------------------------------------------------------------------------------------------------------------------------------------------------------------------------------------------------------------------------------------------|

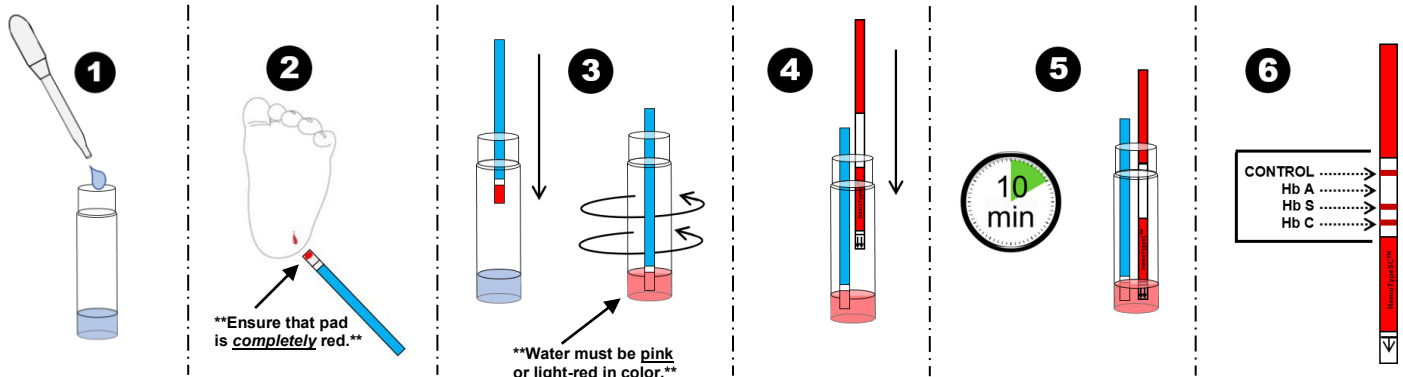

## INSTRUCTIONS FOR USE

### PROCEDURE (DRIED BLOOD SPOTS):

HemoTypeSC™ can be adapted for use with dried blood spots (DBS). The DBS should be cut to be the same size as the circles below and must be completely red with blood:

Before blood spotting: ○

After blood spotting: ●

1. Using Dropper Pipette, add six (6) drops of water to Test Vial. Place Test Vial in a compatible rack.
2. Cut out DBS to be the same size as the above circles and completely submerge under the water inside the Test Vial.
3. Wait 10 minutes.
4. Open Vial of Test Strips, remove one Test Strip, and reclose Vial. Insert HemoTypeSC™ Test Strip into Test Vial with arrows pointing DOWN.
5. Wait 10 minutes.
6. Take HemoTypeSC™ Test Strip out of the Test Vial and read results. Compare Test Strip to Results Chart below for reference.

### READING RESULTS:

Red lines may appear at each of three hemoglobin variant-specific locations (HbA, HbS, & HbC), and a control location.

- If no control line appears, the test is invalid and should be repeated.

- The PRESENCE of a line indicates the ABSENCE of the hemoglobin.
- The ABSENCE of a line indicates the PRESENCE of the hemoglobin.

### Compare the HemoTypeSC™ Test Strip to the Chart below to Obtain Test Result

[Missing Line(s) = Hemoglobin(s) Are Present in the Blood]

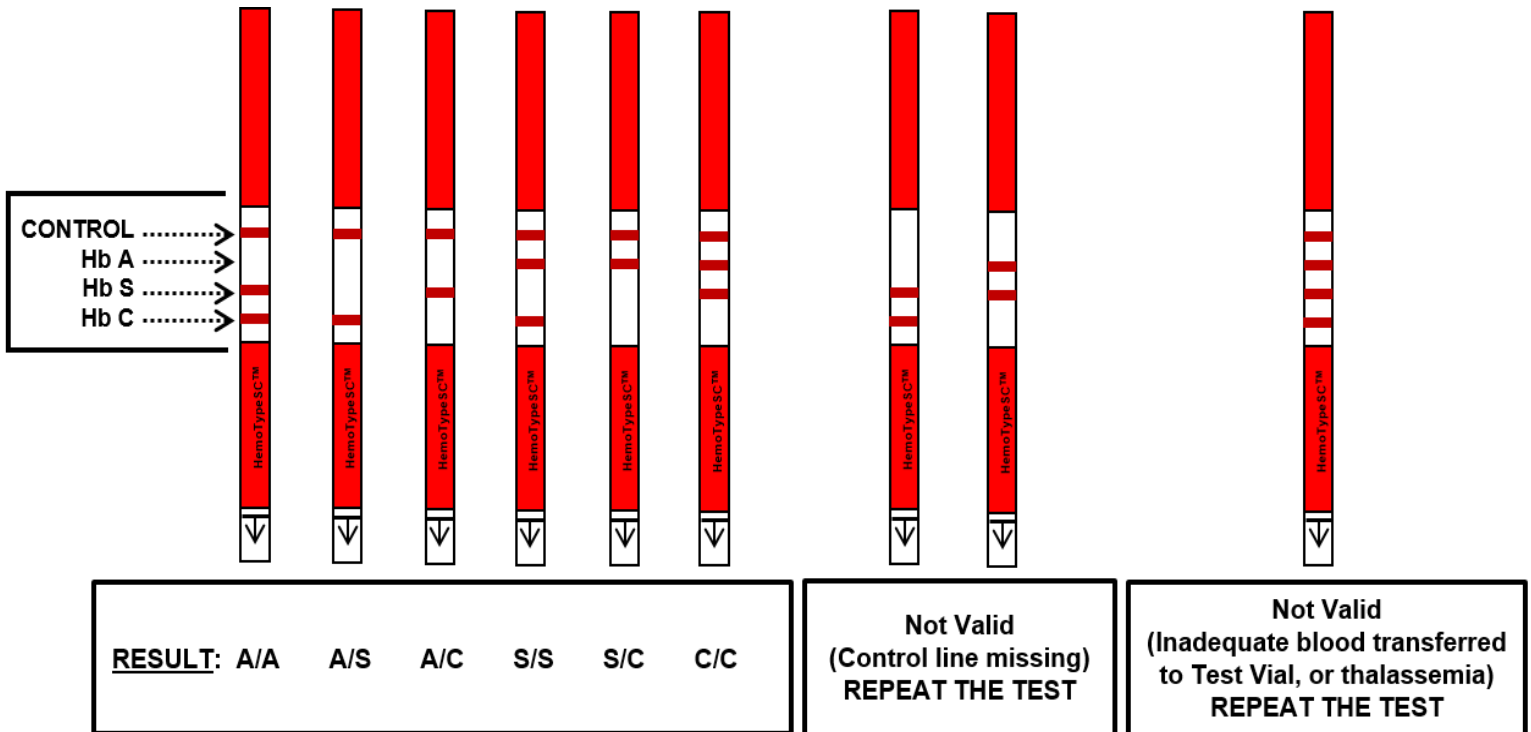

**\*\*IMPORTANT:** If test result is unclear, repeat the entire procedure starting with Step #1.
